# Supplementary material for: Organic acids can crosslink poly(ionic liquid)s into mesoporous polyelectrolyte complexes
Source: Royal Society of Chemistry journal article supplement (doi:10.1039/c3py00159h), 2013-01-01
Supplement: c3py00159h.pdf [file c3py00159h.pdf]

## Supporting Information

# Organic Acids Can Crosslink Poly(ionic liquid)s into Mesoporous Polyelectrolyte Complex

Qiang Zhao, Sebastian Soll, Markus Antonietti, Jiayin Yuan\*

Max-Planck-Institute of Colloids and Interfaces, Department of Colloid Chemistry, D-14476  
Potsdam, Germany

## 1. Chemicals

Lithium bis(trifluoro methanesulfonyl)imide ( $\text{LiTf}_2\text{N}$ , 99.95%), benzoic acid, terephthalic acid, benzene-1,3,5-tricarboxylic acid, 1,2,4,5-benzenetetracarboxylic acid, benzenhexacarboxylic acid, citric acid, oxalic acid, trans-aconitic acid, and methyl orange were purchased from Sigma-Aldrich and used without further purification. Poly(3-cyanomethyl-1-vinylimidazolium bromide) (PCMVImBr) was synthesized according to our previous method (*Chem. Mater.* 2010, 22, 5003–5012), and its  $^1\text{H}$ -NMR spectrum was shown in **Figure S1**. Poly(3-cyanomethyl-1-vinylimidazolium bis(trifluoro methanesulfonyl)imide) (PCMVImTf<sub>2</sub>N) was prepared by anion exchange of PCMVImBr with  $\text{LiTf}_2\text{N}$ . All the solvents in this study were of analytic grade. The apparent molecular weight of the model PCMVImBr was measured by GPC (eluent: water with 0.2 M  $\text{Na}_2\text{SO}_4$  + 1% acetic acid at room temperature) to be  $5.93 \times 10^4$  g/mol (PDI: 2.95), thus the apparent molecular weight of the PCMVImTf<sub>2</sub>N is calculated to be  $1.15 \times 10^5$  g/mol.

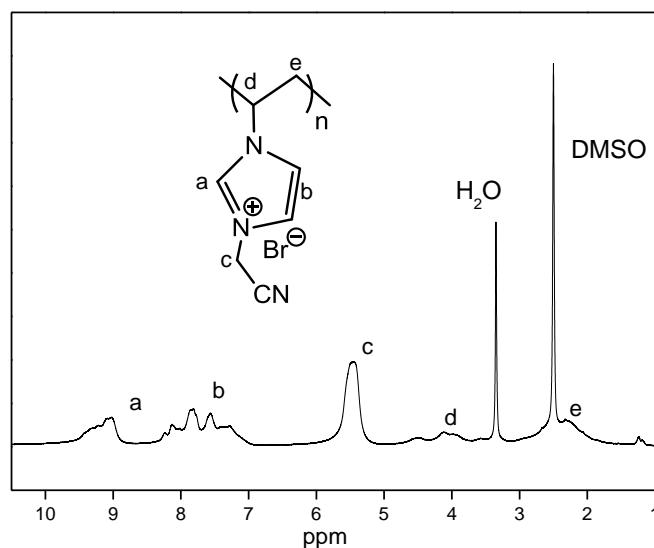

**Figure S1**  $^1\text{H}$ -NMR spectrum of PCMVImBr in  $\text{DMSO-}d_6$ .

## 2. Characterization methods

Nitrogen ( $\text{N}_2$ ) sorption experiments were performed with a Quantachrome Autosorb-1 or Quadrasorb at liquid nitrogen temperature, and data analysis was performed by Quantachrome software. The surface area and pore volume were calculated using the Brunauer–Emmett-Teller (BET) equation, and the Barrett-Joyner-Halenda (BJH) method, respectively. Samples for BET measurements were degassed at  $80\text{ }^\circ\text{C}$  for 20 h before measurements.

FT-IR spectra were performed on a BioRad 6000 FT-IR spectrometer; samples were measured in solid state using a Single Reflection Diamond ATR. Scanning electron microscopy (SEM) was performed on a GEMINI LEO 1550 microscope at 3 kV, and samples were coated with gold before examination.

## 3. Preparation of PCMVImTf<sub>2</sub>N-based PILC networks

The chemical structures of all multi-valent anion molecules utilized to prepare mesoporous PILC networks with PCMVImTf<sub>2</sub>N were shown in Scheme S1. PCMVImTf<sub>2</sub>N and small acid molecules were dissolved in DMSO solvent at room temperature to form mixture solution, in which the PCMVImTf<sub>2</sub>N concentration was kept at 5 wt%, and the mole ratio of carboxylic acid groups to the monomer units on PCMVImTf<sub>2</sub>N was fixed at 1. 30 mL of diethyl ether containing 0.3 wt% of NH<sub>3</sub> (prepared by using 2M NH<sub>3</sub> in isopropanol as ammonia source) was placed in a glass beaker, into which 3 mL of polymer mixture solution was dropped (speed: 3 mL/min) under stirring (900 rpm) and sonication (40 % sonication amplitude). The sonication was kept for 1 min after the addition was finished. The PIL complex materials precipitated out from the solution, washed by diethyl ether three times, and dried under vacuum at 50 °C for 12 h.

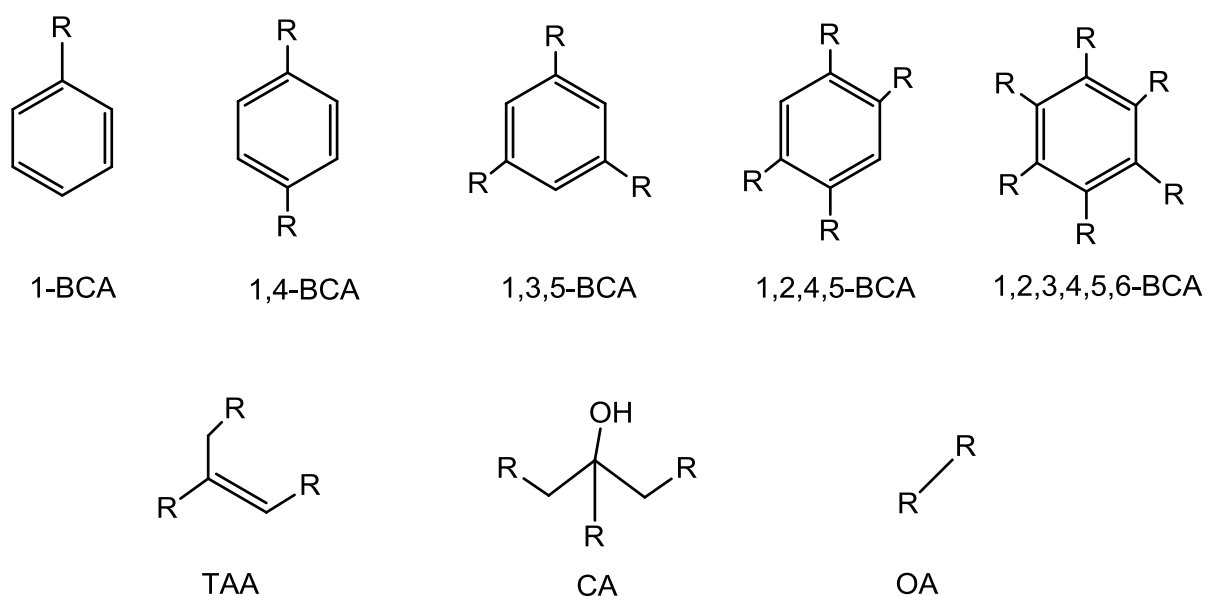

Scheme S1. Chemical structures of small acid molecules utilized in this study. R refers to carboxylic acid groups.

#### 4. Supplementary data

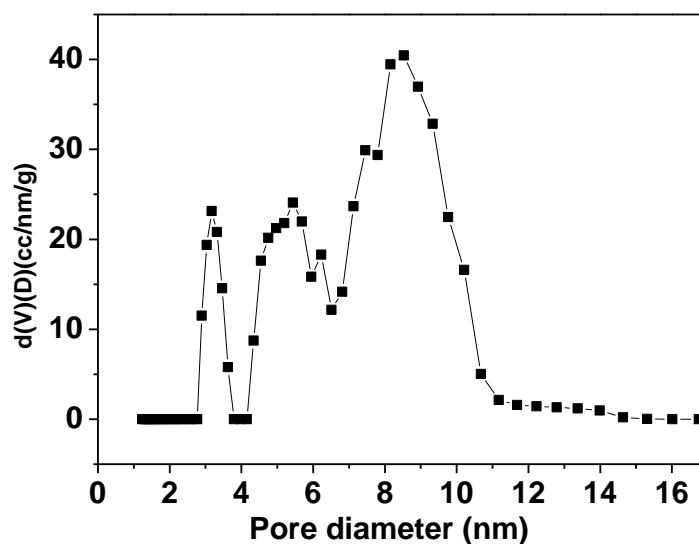

Figure S2 Pore size distribution curve of PILC network prepared from PCMVImTf<sub>2</sub>N and 1,2,4,5-BCA. It was calculated from the DFT method.

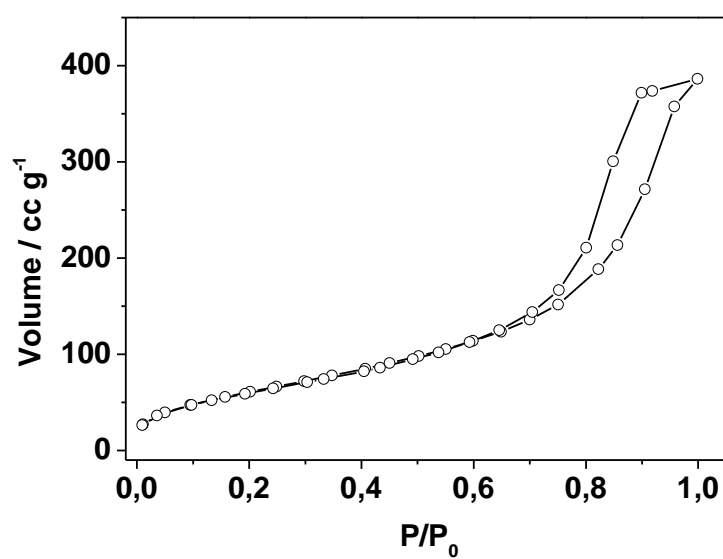

Figure S3 Nitrogen sorption isothermals of PILC networks (from PCMVImTf<sub>2</sub>N and 1,2,4,5-BCA) being refluxed in acetone for 24 h.

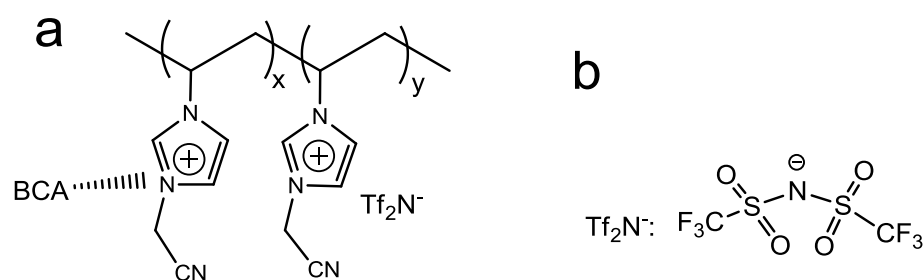

**Scheme S2.** Definition of degree of ionic complexation (DIC):  $DIC = \frac{x}{x+y}$ , wherein x and y were the imidazolium anions that **have** and **do not have** ionic complexation with BCA, respectively. DIC were calculated on basis of element analysis (sulfur and nitrogen element) because the sulfur element in the PILC only exist in rest  $Tf_2N$  counter ions.

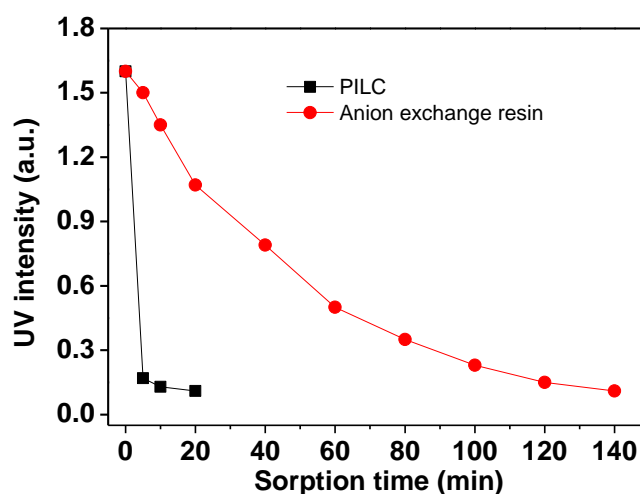

Figure S4 UV absorption ( $\lambda \sim 435$  nm) of methyl orange solution (0.02 M in ethanol) after being treated with PILC (10 mg) and an anion exchange resin (Ambersep 900(OH), Alfa Aesar, 10 mg), respectively.
